# Supplementary material for: Artificial TALE as a Convenient Protein Platform for Engineering Broad-Spectrum Resistance to Begomoviruses
Source: PubMed Central journal article supplement (PMC4576204; doi:10.3390/v7082843), 2015-08-20
Supplement: viruses-07-02843-s001.pdf [file viruses-07-02843-s001.pdf]

# Supplementary Materials

## Supplementary Text 1:

Double-repeat units (underlines from 5' to 3' are restriction sites of Spe I, Nhe I, and Hind III, sequences with grey background encode RVDs):

dTpT

ACTAGTAAAATGGCGGCGGCAAGCAGGCGCTGGAGACGGTGCAGCGCCTGTTGCCGGGTCT  
GTGCCAGGACCATGGCTTGTGCGCCCGCCCAAGTAGTCGCGATTGCAAACAACGGGGGGG  
GAAAACAAGCTCTCGAAATGGTTCAAAGATTGCTGCCCATGCTTTGTCAAGCGCACGGGC  
TGACCCCGGACCAGGTGGTGGCCATCGCTAGCGGGAAGCTT

dTpC

ACTAGTAAAATGGCGGCGGCAAGCAGGCGCTGGAGACGGTGCAGCGCCTGTTGCCGGGTCT  
GTGCCAGGACCATGGCTTGTGCGCCCGCCCAAGTAGTCGCGATTGCAAACCACGACGGGGG  
AAAACAAGCTCTCGAAATGGTTCAAAGATTGCTGCCCATGCTTTGTCAAGCGCACGGGCT  
GACCCCGGACCAGGTGGTGGCCATCGCTAGCGGGAAGCTT

dTpA

ACTAGTAAAATGGCGGCGGCAAGCAGGCGCTGGAGACGGTGCAGCGCCTGTTGCCGGGTCT  
GTGCCAGGACCATGGCTTGTGCGCCCGCCCAAGTAGTCGCGATTGCAAACAACATTGGGGG  
AAAACAAGCTCTCGAAATGGTTCAAAGATTGCTGCCCATGCTTTGTCAAGCGCACGGGCT  
GACCCCGGACCAGGTGGTGGCCATCGCTAGCGGGAAGCTT

dTpG

ACTAGTAAAATGGCGGCGGCAAGCAGGCGCTGGAGACGGTGCAGCGCCTGTTGCCGGGTCT  
GTGCCAGGACCATGGCTTGTGCGCCCGCCCAAGTAGTCGCGATTGCAAACAACAAGGGGG  
GAAAACAAGCTCTCGAAATGGTTCAAAGATTGCTGCCCATGCTTTGTCAAGCGCACGGGC  
TGACCCCGGACCAGGTGGTGGCCATCGCTAGCGGGAAGCTT

dCpT

ACTAGTCACGATGGCGGCAAGCAGGCGCTGGAGACGGTGCAGCGCCTGTTGCCGGGTCTG  
TGCCAGGACCATGGCTTGTGCGCCCGCCCAAGTAGTCGCGATTGCAAACAACGGGGGGGG  
AAAACAAGCTCTCGAAATGGTTCAAAGATTGCTGCCCATGCTTTGTCAAGCGCACGGGCT  
GACCCCGGACCAGGTGGTGGCCATCGCTAGCGGGAAGCTT

dCpC

ACTAGTCACGATGGCGGCAAGCAGGCGCTGGAGACGGTGCAGCGCCTGTTGCCGGGTCTG  
TGCCAGGACCATGGCTTGTGCGCCCGCCCAAGTAGTCGCGATTGCAAACCATGACGGGGGA  
AAACAAGCTCTCGAAATGGTTCAAAGATTGCTGCCCATGCTTTGTCAAGCGCACGGGCTG  
ACCCCGGACCAGGTGGTGGCCATCGCTAGCGGGAAGCTT

dCpA

ACTAGTCACGATGGCGGCAAGCAGGCGCTGGAGACGGTGCAGCGCCTGTTGCCGGGTCTG  
TGCCAGGACCATGGCTTGTGCGCCCGCCCAAGTAGTCGCGATTGCAAACAACATTGGGGGA  
AAACAAGCTCTCGAAATGGTTCAAAGATTGCTGCCCATGCTTTGTCAAGCGCACGGGCTG  
ACCCCGGACCAGGTGGTGGCCATCGCTAGCGGGAAGCTT

dCpG

ACTAGTCACGATGGCGGCAAGCAGGCGCTGGAGACGGTGCAGCGCCTGTTGCCGGGTCTG  
TGCCAGGACCATGGCTTGTGCGCCCGCCCAAGTAGTCGCGATTGCAAACAACAAGGGGG

AAAACAAGCTCTCGAAATGGTTCAAAGATTGCTGCCCATGCTTTGTCAAGCGCACGGGCT  
GACCCCGGACCAGGTGGTGGCCATCGCTAGCGGGAAGCTT

dApT

ACTAGTAATATTGGCGGCAAGCAGGCGCTGGAGACGGTGCAGCGCCTGTTGCCGGGTCTG  
TGCCAGGACCATGGCTTGTGCGCCCGCCCAAGTAGTCGCGATTGCAAACAACGGGGGGGG  
AAAACAAGCTCTCGAAATGGTTCAAAGATTGCTGCCCATGCTTTGTCAAGCGCACGGGCT  
GACCCCGGACCAGGTGGTGGCCATCGCTAGCGGGAAGCTT

dApC

ACTAGTAATATTGGCGGCAAGCAGGCGCTGGAGACGGTGCAGCGCCTGTTGCCGGGTCTG  
TGCCAGGACCATGGCTTGTGCGCCCGCCCAAGTAGTCGCGATTGCAAACCACGACGGGGGA  
AAACAAGCTCTCGAAATGGTTCAAAGATTGCTGCCCATGCTTTGTCAAGCGCACGGGCTG  
ACCCCGGACCAGGTGGTGGCCATCGCTAGCGGGAAGCTT

dApA

ACTAGTAATATTGGCGGCAAGCAGGCGCTGGAGACGGTGCAGCGCCTGTTGCCGGGTCTG  
TGCCAGGACCATGGCTTGTGCGCCCGCCCAAGTAGTCGCGATTGCAAACAACATCGGGGGGA  
AAACAAGCTCTCGAAATGGTTCAAAGATTGCTGCCCATGCTTTGTCAAGCGCACGGGCTG  
ACCCCGGACCAGGTGGTGGCCATCGCTAGCGGGAAGCTT

dApG

ACTAGTAATATTGGCGGCAAGCAGGCGCTGGAGACGGTGCAGCGCCTGTTGCCGGGTCTG  
TGCCAGGACCATGGCTTGTGCGCCCGCCCAAGTAGTCGCGATTGCAAACAACAAAGGGGG  
AAAACAAGCTCTCGAAATGGTTCAAAGATTGCTGCCCATGCTTTGTCAAGCGCACGGGCT  
GACCCCGGACCAGGTGGTGGCCATCGCTAGCGGGAAGCTT

dGpT

ACTAGTAATAAGGGCGGCAAGCAGGCGCTGGAGACGGTGCAGCGCCTGTTGCCGGGTCT  
GTGCCAGGACCATGGCTTGTGCGCCCGCCCAAGTAGTCGCGATTGCAAACAACGGGGGGG  
GAAAACAAGCTCTCGAAATGGTTCAAAGATTGCTGCCCATGCTTTGTCAAGCGCACGGGC  
TGACCCCGGACCAGGTGGTGGCCATCGCTAGCGGGAAGCTT

dGpC

ACTAGTAATAAGGGCGGCAAGCAGGCGCTGGAGACGGTGCAGCGCCTGTTGCCGGGTCT  
GTGCCAGGACCATGGCTTGTGCGCCCGCCCAAGTAGTCGCGATTGCAAACCACGATGGGGG  
AAAACAAGCTCTCGAAATGGTTCAAAGATTGCTGCCCATGCTTTGTCAAGCGCACGGGCT  
GACCCCGGACCAGGTGGTGGCCATCGCTAGCGGGAAGCTT

dGpA

ACTAGTAATAAGGGCGGCAAGCAGGCGCTGGAGACGGTGCAGCGCCTGTTGCCGGGTCT  
GTGCCAGGACCATGGCTTGTGCGCCCGCCCAAGTAGTCGCGATTGCAAACAACATCGGGGG  
AAAACAAGCTCTCGAAATGGTTCAAAGATTGCTGCCCATGCTTTGTCAAGCGCACGGGCT  
GACCCCGGACCAGGTGGTGGCCATCGCTAGCGGGAAGCTT

dGpG

ACTAGTAATAAGGGCGGCAAGCAGGCGCTGGAGACGGTGCAGCGCCTGTTGCCGGGTCT  
GTGCCAGGACCATGGCTTGTGCGCCCGCCCAAGTAGTCGCGATTGCAAACAACAAAGGGG  
GAAAACAAGCTCTCGAAATGGTTCAAAGATTGCTGCCCATGCTTTGTCAAGCGCACGGGC  
TGACCCCGGACCAGGTGGTGGCCATCGCTAGCGGGAAGCTT

Flank\_seq1 (underlines are *Nde* I, *Nhe* I, *Hind* III, and *Xho* I restriction sites):

CCATATGGTGGATCTACGCACGCTCGGCTACAGCCAGCAGCAACAGGAGAAGATCAAAC  
 CGAAGGTTTCGTTTCGACAGTGGCGCAGCACCACGAGGCACTGGTCGGCCATGGGTTTACAC  
 ACGCGCACATCGTTGCGCTCAGCCAACACCCGGCAGCGTTAGGGACCGTCGCTGTCAAGT  
 ATCAGGACATGATCGCAGCGTTGCCAGAGGCGACACACGAAGCGATCGTTGGCGTCGGC  
 AAACAGTGGTCCGGCGCACGCGCTCTGGAGGCCTTGCTCACGGTGGCGGGAGAGTTGAG  
 AGGTCCACCGTTACAGTTGGACACAGGCCAACTTCTCAAGATTGCAAAACGTGGCGGCGT  
 GACCGCAGTGGAGGCAGTGCATGCATGGCGCAATGCACTGACGGGTGCCCCCTGAACCT  
 GACCCCGGACCAGGTGGTGGCCATCGCTAGCAATGGCGGCGGCAAGCAGGCGCTGGAGA  
 GCATTTTGCACAGTTATCTCGCCCTGATCCGGCGTTGGCCGCGTTGACCAACGACCGCCT  
 CGTCGCCTTGGCCTGCATCGGCGGACGCTCTGCGCTGAATGCAGTGAAAGACGGATTGCC  
 GAATGCGCTGACATTGATCAGAAGAGCCAATAGCCGTATTCCCGAACGCACAAAGCTTGG  
GCTCGAGG

TALE1 (underlines are *Nde* I, *Hind* III, and *Xho* I restriction sites):

CCATATGGTGGATCTACGCACGCTCGGCTACAGCCAGCAGCAACAGGAGAAGATCAAAC  
 CGAAGGTTTCGTTTCGACAGTGGCGCAGCACCACGAGGCACTGGTCGGCCATGGGTTTACAC  
 ACGCGCACATCGTTGCGCTCAGCCAACACCCGGCAGCGTTAGGGACCGTCGCTGTCAAGT  
 ATCAGGACATGATCGCAGCGTTGCCAGAGGCGACACACGAAGCGATCGTTGGCGTCGGC  
 AAACAGTGGTCCGGCGCACGCGCTCTGGAGGCCTTGCTCACGGTGGCGGGAGAGTTGAG  
 AGGTCCACCGTTACAGTTGGACACAGGCCAACTTCTCAAGATTGCAAAACGTGGCGGCGT  
 GACCGCAGTGGAGGCAGTGCATGCATGGCGCAATGCACTGACGGGTGCCCCCTGAACCT  
 GACCCCGGACCAGGTGGTGGCCATCGCTAGTAATATTGGCGGCAAGCAGGCGCTGGAGA  
 CGGTGCAGCGCCTGTTGCCGGGTCTGTGCCAGGACCATGGCTTGTGCGCCCGCCCAAGTAG  
 TCGCGATTGCAAACCACGACGGGGGAAAACAAGCTCTCGAAATGGTTCAAAGATTGCTGC  
 CCATGCTTTGTCAAGCGCACGGGCTGACCCCGGACCAGGTGGTGGCCATCGCTAGTAATA  
 AGGGCGGCAAGCAGGCGCTGGAGACGGTGCAGCGCCTGTTGCCGGGTCTGTGCCAGGAC  
 CATGGCTTGTGCGCCCGCCCAAGTAGTCGCGATTGCAAACAACAAAGGGGGAAAACAAGC  
 TCTCGAAATGGTTCAAAGATTGCTGCCCATGCTTTGTCAAGCGCACGGGCTGACCCCGGA  
 CCAGGTGGTGGCCATCGCTAGTAATATTGGCGGCAAGCAGGCGCTGGAGACGGTGCAGC  
 GCCTGTTGCCGGGTCTGTGCCAGGACCATGGCTTGTGCGCCCGCCCAAGTAGTCGCGATTG  
 CAAACAACGGGGGGGGAAAACAAGCTCTCGAAATGGTTCAAAGATTGCTGCCCATGCTTT  
 GTCAAGCGCACGGGCTGACCCCGGACCAGGTGGTGGCCATCGCTAGTAATAAGGGCGGC  
 AAGCAGGCGCTGGAGACGGTGCAGCGCCTGTTGCCGGGTCTGTGCCAGGACCATGGCTTG  
 TCGCCCGCCCAAGTAGTCGCGATTGCAAACAACAAAGGGGGAAAACAAGCTCTCGAAAT  
 GGTTCAAAGATTGCTGCCCATGCTTTGTCAAGCGCACGGGCTGACCCCGGACCAGGTGGT  
 GGCCATCGCTAGTCACGATGGCGGCAAGCAGGCGCTGGAGACGGTGCAGCGCCTGTTGCC  
 GGGTCTGTGCCAGGACCATGGCTTGTGCGCCCGCCCAAGTAGTCGCGATTGCAAACCATGA  
 CGGGGGAAAACAAGCTCTCGAAATGGTTCAAAGATTGCTGCCCATGCTTTGTCAAGCGCA  
 CGGGCTGACCCCGGACCAGGTGGTGGCCATCGCTAGTAATAAGGGCGGCAAGCAGGCGC  
 TGGAGACGGTGCAGCGCCTGTTGCCGGGTCTGTGCCAGGACCATGGCTTGTGCGCCCGCC  
 AAGTAGTCGCGATTGCAAACCACGATGGGGGAAAACAAGCTCTCGAAATGGTTCAAAGA

TTGCTGCCCATGCTTTGTCAAGCGCACGGGCTGACCCCGGACCAGGTGGTGGCCATCGCT  
AGCAATGGCGGGCGGCAAGCAGGCGCTGGAGAGCATTTTTTGCACAGTTATCTCGCCCTGAT  
 CCGGCGTTGGCCGCGTTGACCAACGACCGCCTCGTCGCCTTGGCCTGCATCGGCGGACGC  
 TCTGCGCTGAATGCAGTGAAAGACGGATTGCCGAATGCGCTGACATTGATCAGAAGAGCC  
 AATAGCCGTATTCCCGAACGCACAAAGCTTGGGCTCGAGG

TALE2(underlines are Nde I, Hind III, and Xho I restriction sites):

CCATATGGTGGATCTACGCACGCTCGGCTACAGCCAGCAGCAACAGGAGAAGATCAAAC  
 CGAAGGTTTCGTTGACAGTGGCGCAGCACCACGAGGCACTGGTCGGCCATGGGTTTACAC  
 ACGCGCACATCGTTGCGCTCAGCCAACACCCGGCAGCGTTAGGGACCGTCGCTGTCAAGT  
 ATCAGGACATGATCGCAGCGTTGCCAGAGGCGACACACGAAGCGATCGTTGGCGTCGGC  
 AAACAGTGGTCCGGCGCACGCGCTCTGGAGGCCTTGCTCACGGTGGCGGGAGAGTTGAG  
 AGGTCCACCGTTACAGTTGGACACAGGCCAACTTCTCAAGATTGCAAACCGTGGCGGGCGT  
 GACCGCAGTGGAGGCAGTGCATGCATGGCGCAATGCACTGACGGGTGCCCCCTGAACCT  
 GACCCCGGACCAGGTGGTGGCCATCGCTAGTAATAAGGGCGGCAAGCAGGCGCTGGAGA  
 CGGTGCAGCGCCTGTTGCCGGGTCTGTGCCAGGACCATGGCTTGTGCCCCGCCAAGTAG  
 TCGCGATTGCAAACAACAAAGGGGGAAAACAAGCTCTCGAAATGGTTCAAAGATTGCTG  
 CCCATGCTTTGTCAAGCGCACGGGCTGACCCCGGACCAGGTGGTGGCCATCGCTAGTCAC  
GATGGCGGCAAGCAGGCGCTGGAGACGGTGCAGCGCCTGTTGCCGGGTCTGTGCCAGGA  
 CCATGGCTTGTGCCCCGCCAAGTAGTCGCGATTGCAAACCATGACGGGGGAAAACAAGC  
 TCTCGAAATGGTTCAAAGATTGCTGCCCATGCTTTGTCAAGCGCACGGGCTGACCCCGGA  
 CCAGGTGGTGGCCATCGCTAGTAATAAGGGCGGCAAGCAGGCGCTGGAGACGGTGCAGC  
 GCCTGTTGCCGGGTCTGTGCCAGGACCATGGCTTGTGCCCCGCCAAGTAGTCGCGATTG  
 CAAACCACGATGGGGGAAAACAAGCTCTCGAAATGGTTCAAAGATTGCTGCCCATGCTTT  
 GTCAAGCGCACGGGCTGACCCCGGACCAGGTGGTGGCCATCGCTAGTAATAAGGGCGGC  
 AAGCAGGCGCTGGAGACGGTGCAGCGCCTGTTGCCGGGTCTGTGCCAGGACCATGGCTTG  
 TCGCCCCGCCAAGTAGTCGCGATTGCAAACCACGATGGGGGAAAACAAGCTCTCGAAAT  
 GGTTCAAAGATTGCTGCCCATGCTTTGTCAAGCGCACGGGCTGACCCCGGACCAGGTGGT  
 GGCCATCGCTAGTAATATTGGCGGCAAGCAGGCGCTGGAGACGGTGCAGCGCCTGTTGCC  
 GGGTCTGTGCCAGGACCATGGCTTGTGCCCCGCCAAGTAGTCGCGATTGCAAACAACAA  
AGGGGGAAAACAAGCTCTCGAAATGGTTCAAAGATTGCTGCCCATGCTTTGTCAAGCGCA  
 CGGGCTGACCCCGGACCAGGTGGTGGCCATCGCTAGTCACGATGGCGGCAAGCAGGCGC  
 TGGAGACGGTGCAGCGCCTGTTGCCGGGTCTGTGCCAGGACCATGGCTTGTGCCCCGCC  
 AAGTAGTCGCGATTGCAAACAACAAAGGGGGAAAACAAGCTCTCGAAATGGTTCAAAGA  
 TTGCTGCCCATGCTTTGTCAAGCGCACGGGCTGACCCCGGACCAGGTGGTGGCCATCGCT  
 AGCAATGGCGGGCGGCAAGCAGGCGCTGGAGAGCATTTTTTGCACAGTTATCTCGCCCTGAT  
 CCGGCGTTGGCCGCGTTGACCAACGACCGCCTCGTCGCCTTGGCCTGCATCGGCGGACGC  
 TCTGCGCTGAATGCAGTGAAAGACGGATTGCCGAATGCGCTGACATTGATCAGAAGAGCC  
 AATAGCCGTATTCCCGAACGCACAAAGCTTGGGCTCGAGG

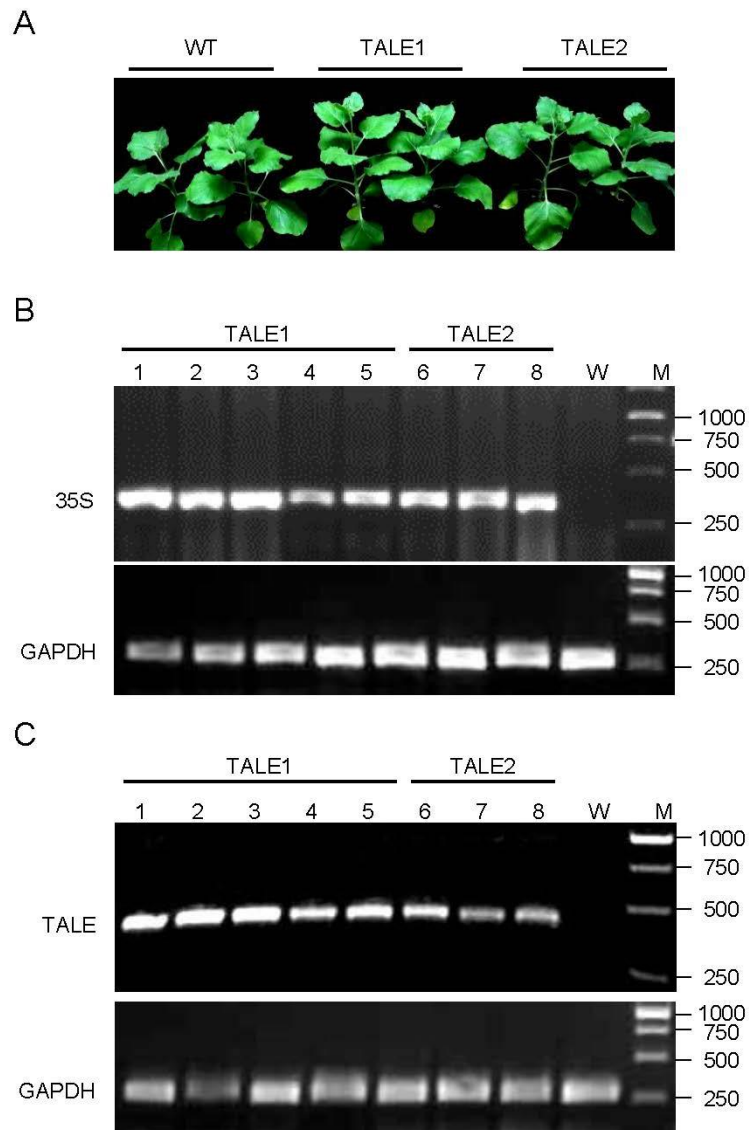

**Figure S1.** Production and analysis transgenic *N. benthamiana* plants. **(A)** Phenotypes of TALE1 and TALE2 transgenic *N. benthamiana* plants. Pictures were taken at 4 weeks post germination; **(B)** Detection of T-DNA insertion in transgenic *N. benthamiana* plants. The presence of T-DNA insertion in *N. benthamiana* genome was determined by amplified 350 bp fragments from 35S promoter. A 250 bp fragment of GAPDH gene was amplified as loading controls; **(C)** Detection of expression of TALE1 and TALE2 in transgenic *N. benthamiana* plants. A 420 bp fragment of artificial *TALE1* and *TALE2* was amplified from cDNA transcribed from total RNA extracted from transgenic *N. benthamiana* leaves with oligodT<sub>15</sub>. A 250 bp fragment of GAPDH gene was amplified as loading controls. DNA ladders from top to bottoms represent 1000, 750, 500, and 250 bp binds, respectively.

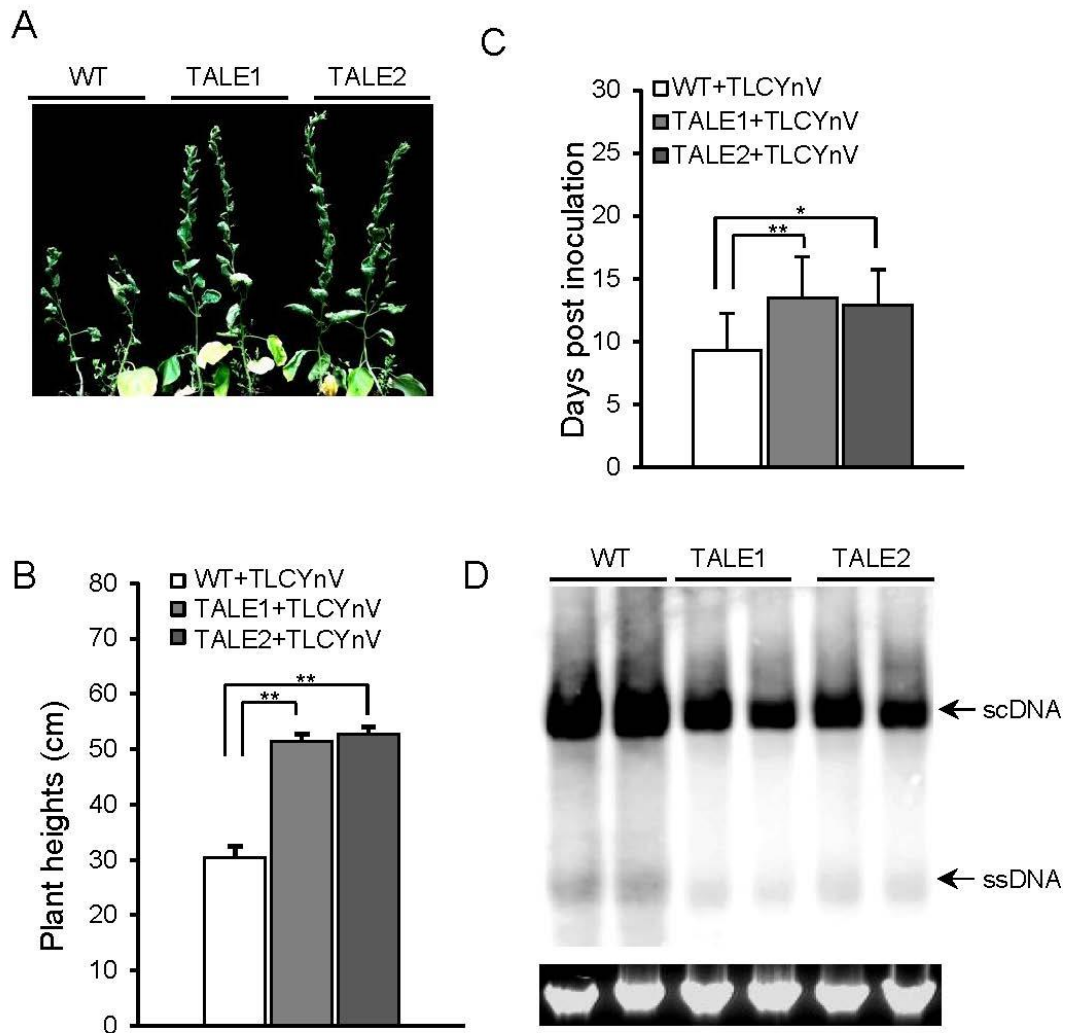

**Figure S2.** Transgenic plants show resistance to TLCYnV. **(A)** Symptoms induced by TLCYnV on wild-type and transgenic TALE1 and TALE2 *N. benthamiana* plants. Picture was taken at 20 dpi; **(B)** Average plant height of wild-type and transgenic TALE1, and TALE2 plants infected by TLCYnV. Numbers were calculated from two independent trials with each trial of 10 plants. \*\* indicates  $P < 0.01$ ; **(C)** Average time for TLCYnV inducing viral symptom on systemic leaves of wild-type and transgenic plants. Numbers were calculated from two independent trials with each trial of 10 plants. \* indicates  $P < 0.05$ , whereas \*\* indicates  $P < 0.01$ ; **(D)** Southern blot detection of TLCYnV genomic DNA in wild-type, TALE1, and TALE2 transgenic plants. An ethidium bromide stained gel was shown at the bottom for indicating DNA loadings.

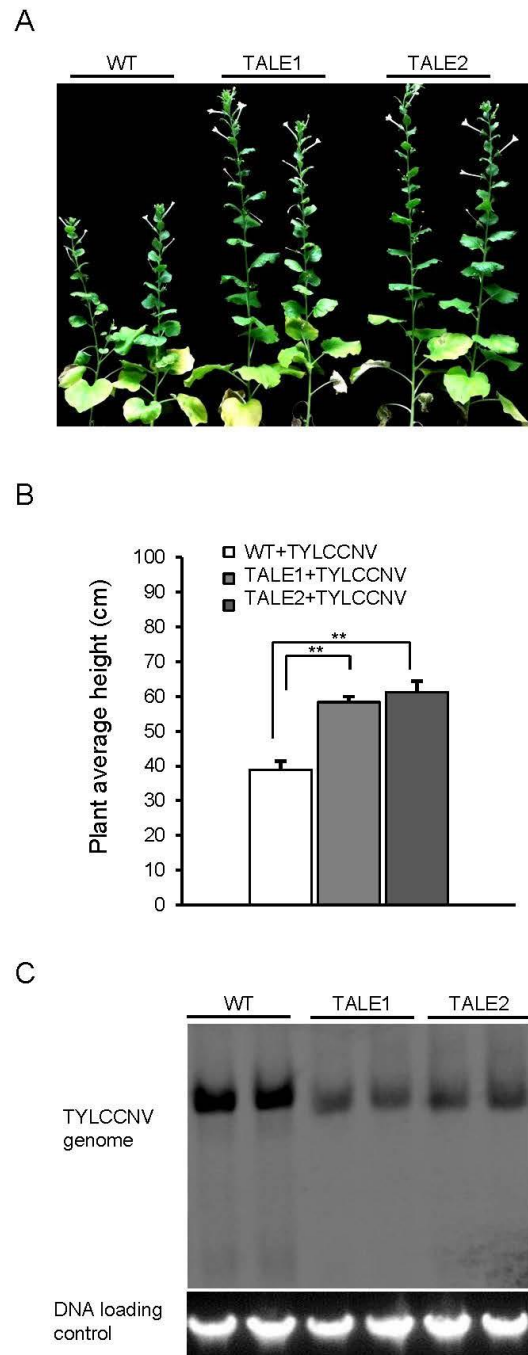

**Figure S3.** Transgenic plants show resistance to TYCCNV. **(A)** Phenotypes of wild-type and transgenic TALE1 and TALE2 *N. benthamiana* plants infected by TYCCNV at 20 dpi; **(B)** Average plant height of wild-type and transgenic TALE1 and TALE2 plants after infecting by TYCCNV. Numbers were calculated from two independent trials with each trial of 10 plants. \*\* indicates  $P < 0.01$ ; **(C)** Southern blot detection of TYCCNV genomic DNA in wild-type, TALE1, and TALE2 transgenic plants. An ethidium bromide stained gel showed at the bottom for indicating DNA loadings.
